# Supplementary material
Source: Springer Nature journal article supplement (https://www.springermedizin.de/resource/supplementary/12961_2013_343_MOESM1_ESM.pdf/9571088)
Supplement: MOESM1 [file 9571088]

ಆರೋಗ್ಯ ವ್ಯವಸ್ಥೆಗಳ ಚಿಂತನೆಯ ಅನ್ವಯಿಸುವಿಕೆ ಮುಂದುವರಿಸುವುದು -ಜಿಲ್ಲೆಯ

ವ್ಯವಸ್ಥಾಪಕರಿಗೊಂದು ಸಾಮರ್ಥ್ಯ ನಿರ್ಮಾಣ ಕಾರ್ಯಕ್ರಮದ ನೈಜ ಮೌಲ್ಯಮಾಪನ

### ಮುನ್ನುಡಿ

ಆರೋಗ್ಯ ಸಂಸ್ಥೆಗಳ ಕಾರ್ಯನಿರ್ವಹಣೆಯ ಸುಧಾರಣೆಗಾಗಿ, ಸಾಮರ್ಥ್ಯ ನಿರ್ಮಾಣದಂತಹ ಆರೋಗ್ಯ ವ್ಯವಸ್ಥೆಯ ಮದ್ಯಸ್ಥಿಕೆಯನ್ನು, ಸಾಮಾನ್ಯವಾಗಿ ಜಿಲ್ಲೆಗಳಾದ್ಯಂತ ಅಳವಡಿಸಲಾಗುತ್ತದೆ ಆದರೆ, ಇಂತಹ ಮದ್ಯಸ್ಥಿಕೆಗಳು, ಕೆಲವು ಆರೋಗ್ಯ ಕೇಂದ್ರಗಳಲ್ಲಿ ಅಥವಾ ಉಪ ಜಿಲ್ಲಾ ವ್ಯವಸ್ಥೆಗಳಲ್ಲಿ ಮಾತ್ರ ಪ್ರಯೋಜನಕಾರಿಯಾಗಿ, ಇತರಡೆಗಳಲ್ಲಿ ಕಾರ್ಯನಿರ್ವಹಿಸುವುದರಲ್ಲಿ ಫಲಕಾರಿಯಾಗುವುದಿಲ್ಲ. ಜಿಲ್ಲೆಯ ತಾಲುಕಾ ಕೇಂದ್ರಗಳನ್ನು (ಉಪ-ಘಟಕಗಳು) ಸಂಕೀರ್ಣ ಹೊಂದಾಣಿಕೆಯ ವ್ಯವಸ್ಥೆಯಾಗಿ ದೃಶ್ಯೀಕರಿಸಬಹುದು. ಇಂಥಹ ಕೇಂದ್ರಗಳು, ಸಾಮರ್ಥ್ಯ ನಿರ್ಮಾಣ ಮದ್ಯಸ್ಥಿಕೆಗಳ ಒಳಹರಿವಿಗೆ ವಿವಿಧ ರೀತಿಯಲ್ಲಿ ಪ್ರತಿಕ್ರಿಯಿಸುತ್ತವೆ. ಈ ಪ್ರತಿಕ್ರಿಯೆಯು, ಸ್ಥಳೀಯ ಪರಿಸ್ಥಿತಿಗಳು ಹಾಗೂ ಹಲವಾರು ಪ್ರತ್ಯೇಕ ಸಾಂಸ್ಥಿಕ ಮತ್ತು ಪರಿಸರ ಅಂಶಗಳನ್ನು ಅವಲಂಬಿಸಿರುತ್ತವೆ. ವಾಸ್ತವ ಮೌಲ್ಯಮಾಪನವು, ಸಂಕೀರ್ಣ ಸ್ವಭಾವದ ಬದಲಾವಣೆಯನ್ನು ಜಿಲ್ಲಾ ಮಟ್ಟದ ಸಾಮರ್ಥ್ಯವರ್ಧನೆಯ ಹಸ್ತಕ್ಷೇಪವನ್ನು ಅರ್ಥಮಾಡಿಕೊಳ್ಳಲು ಅನುಕೂಲ ಮಾಡಿಕೊಡುತ್ತದೆ. ಸಂಭರ್ಷ ಅವಲಂಬಿತ ಯಾಂತ್ರಿಕ ಫಲಿತಾಂಶ, ಸಂರಚನೆಯನ್ನು, ಒಂದು ಸಲಕರಣೆಯಾಗಿ ಬಳಸಿದಾಗ ಆಗುವ ವಾಸ್ತವಿಕ ವಿಶ್ಲೇಷಣೆಯನ್ನು ನಾವು ಒಂದು ಗುರಿಯಾಗಿ ಪ್ರದರ್ಶಿಸುತ್ತೇವೆ. ಈ ವಿಶ್ಲೇಷಣೆಯು, ಪರಿಶೋಧನೆಗಳು ಏಕೆ ಮತ್ತು ಹೇಗೆ ಸಂಭವಿಸಿವೆ ಎಂಬುದನ್ನು ಸಂಭರ್ಷ ಹಾಗೂ ಯಾಂತ್ರಿಕ ಬದಲಾವಣೆಯನ್ನು ಪರಿಗಣಿಸಿ ವಿವರಿಸುತ್ತದೆ.

### ವಿಧಾನಗಳು

ಈ ಸಂಸ್ಥೆಗಳನ್ನು ಎರಡು ತಾಲೂಕುಗಳ ಪರಿಶೋಧನೆಯನ್ನು ಹೊಲಿಸುವುದರ ಮೂಲಕ ವಿವರಿಸುತ್ತೇವೆ, ಹಾಗೂ, ವಿವಿಧ ವ್ಯಕ್ತಿಗತ, ಸಂಸ್ಥಾನಿಕ, ಸೂಕ್ತ ಮತ್ತು ಸೂಕ್ತ ಸಂಧರ್ಭೋಚಿತ ಅಂಶಗಳ ಪರಸ್ಪರ ಕ್ರಿಯೆಯಿಂದ ಉಂಟಾಗುವ ವಿವಿಧ ಪರಿಶೋಧನೆಗಳ ಅನ್ವೇಷಣೆಯನ್ನು, ಗುಣಾತ್ಮಕ ಅಂಶಗಳು ( ಸಂಭರ್ಷನ ಟಿಪ್ಪಣಿ ಹಾಗೂ ವಿಶ್ಲೇಷಣೆಯ ಟಿಪ್ಪಣಿ ) ಹಾಗೂ ಪರಿಮಾಣ ಸಂಭಂಧಿ ಅಳತೆಯ ಸ್ವಯಂ ಬದ್ಧತೆ ಹಾಗೂ ಮೇಲ್ವಿಚಾರಣೆಯ ಶೈಲಿಯನ್ನು ಆದರಿಸಿ ಮಾಡುತ್ತೇವೆ.

### ಪರಿಶೋಧನೆಗಳು

ವಿವಿಧ, ವ್ಯಕ್ತಿಗತ, ಸಂಸ್ಥಾನಿಕ ಹಾಗೂ ಪರಿಸರದ ಅಂಶಗಳ ಆಧಾರದ ಮೇಲೆ, ತುಮಕೂರು ತಾಲೂಕುಗಳು ಮದ್ಯಸ್ಥಿಕೆಗಳಿಗೆ ವಿವಿಧ ರೂಪದಲ್ಲಿ ಪ್ರತಿಕ್ರಿಯಿಸಿದವು. ಕಾರ್ಯಬದ್ಧ ಹಾಗೂ ಬದಲಾವಣೆ ತರಲು ಧನಾತ್ಮಕ ಗಾಡತೆ ಹೊಂದಿದ ಸಿಬ್ಬಂದಿ ಇರುವ ತಾಲೂಕದಲ್ಲಿ, ಮದ್ಯಸ್ಥಿಕೆಯು, ಅಸ್ತಿತ್ವದಲ್ಲಿರುವ ಅವಕಾಶಗಳೊಂದಿಗೆ ಒಂದುಗೂಡುವುದರ ಮೂಲಕ ಕೆಲಸ ಮಾಡಿತು. ವಿಕೇಂದ್ರೀಕರಣ ಪ್ರಕ್ರಿಯೆಯ ಮೂಲಕ ಕಾರ್ಯ ಸುಧಾರಣೆಯಾಯಿತು. ಆದಾಗ್ಯೂ, ಸಂಸ್ಥೆಯ ಭದ್ರತೆಯು, ನಿರ್ಣಾಯಕವಾಗಲಿ ಅಥವಾ ಸಾಕಷ್ಟು ವಿಮೋಚನಕಾರಿಯಾಗಿರಲಿಲ್ಲ. ಇತರ ಎರಡು ತಾಲೂಕುಗಳಲ್ಲಿ, ಕಾರ್ಯಬದ್ಧ ಸಿಬ್ಬಂದಿಯು, ತಮ್ಮ ಅನಿಸಿಕೆಗಳನ್ನು ಕಾರ್ಯರೂಪ ತರುವಲ್ಲಿ ವಿಫಲರಾದರು. ಹಾಗೂ, ಸಂಸ್ಥೆಯ ಸಾಧನೆಯನ್ನು ಉತ್ತಮಪಡಿಸಲಾಗಲಿಲ್ಲ. ಆದರೆ, ಇನ್ನೊಂದು ತಾಲೂಕದಲ್ಲಿ, ನಾಯಕತ್ವವು, ಭದ್ರತೆಯ ಕೊರತೆಯನ್ನು ಸರಿದೂಗಿಸುವಲ್ಲಿ ಫಲಕಾರಿಯಾಯಿತು. ಈ ಕಾರ್ಯವನ್ನು, ಆಸ್ಪತ್ರೆಯ ತುರ್ತು ಪ್ರಸೂತಿ ರಕ್ಷಣೆ ಕಾರ್ಯವನ್ನು ಶಕ್ತಿಗತಗೊಳಿಸುವುದರ ಮೂಲಕ, ಮಾಡಲಾಯಿತು.

### ಮುಕ್ತಾಯ

ಸ್ಥಳೀಯ ಆರೋಗ್ಯ ವ್ಯವಸ್ಥೆಯ ಸಾಮರ್ಥ್ಯ ನಿರ್ಮಾಣ ಕಾರ್ಯಕ್ರಮವನ್ನು ಸಂಸ್ಥೆಯ ಆಂತರಿಕ ( ವ್ಯಕ್ತಿಗತ, ಸಂಸ್ಥಾನಿಕ ) ಮತ್ತು, ಬಾಹ್ಯ ( ಸಾಮಾಜಿಕ -ರಾಜಕೀಯ ), ಲಕ್ಷಣಗಳ ನಡುವೆ ಇರುವ ಸಂಬಂಧಗಳನ್ನು ಒಂದುಗೂಡಿಸುವ ಅಥವಾ ಎದಿರಿಸುವ ಮೂಲಕ ಸಾಧಿಸಬಹುದು. ಇಂಥಹ ಮದ್ಯಸ್ಥಿಕೆಯ ವಿನ್ಯಾಸ ಹಾಗೂ ಅನುಷ್ಠಾನಕ್ಕೆ ಪ್ರಚೋದಕ ಹೊಂದಾಣಿಕೆಯ ಅವಕಾಶಗಳನ್ನು ಗುರುತಿಸುವ

ಅಗತ್ಯವಿದೆ. ಸ್ಥಳೀಯ ಆರೋಗ್ಯ ವ್ಯವಸ್ಥೆಗಳ ಉಪ-ಘಟಗಳ ಆಂತರಿಕ ಸಂರಚನೆ ಭಿನ್ನವಾಗಿರುತ್ತದೆ. ಹೀಗಾಗಿ, ಸಾಮರ್ಥ್ಯ ನಿರ್ಮಾಣ ಕಾರ್ಯಕ್ರಮವು ವಿವಿಧ ಮಾರ್ಗಗಳ ಬದಲಾವಣೆ ಸಾಧ್ಯತೆಗಳಿಗೆ ಸ್ಥಳಾವಕಾಶ ಮಾಡಿ ಕೊಡಬೇಕಾಗುತ್ತದೆ.

ರಚಿಸುವ ಹಾಗೂ ಉಹಾಪರಿಷ್ಕೆಯ ಪ್ರಕ್ರಿಯೆಯ ಮೂಲಕ, ವಿಮರ್ಶಾತ್ಮಕ ಹೋಲಿಕೆಯ ಮೂಲಕ, ಪ್ರಾಯೋಗಿಕ ಮಾದರಿಗಳನ್ನು ಪತ್ತೆಹಚ್ಚುವ ಹಾಗೂ, ವ್ಯಾಪ್ತಿ ಮತ್ತು ವಿಸ್ತಾರಗಳ ಮೇಲ್ವಿಚಾರಣೆಯ ಮೂಲಕ, ಮಾಡಿದ ಒಂದು ವಾಸ್ತವವಾದಿ ಮೌಲ್ಯಮಾಪನವು, ಆರೋಗ್ಯ ವ್ಯವಸ್ಥೆಯ ಬದಲಾವಣೆಯ ಸಮಗ್ರ ಮೌಲ್ಯಮಾಪನಕ್ಕೆ ಅನುವು ಮಾಡಿಕೊಡುತ್ತದೆ.

**ಪ್ರಮುಖ ಪದಗಳು:**

ಸಾಮರ್ಥ್ಯ ನಿರ್ಮಾಣ, ವಾಸ್ತವಿಕ, ಮೌಲ್ಯಮಾಪನ, ಕಾರ್ಯಕ್ರಮ ಸಿದ್ಧಾಂತ, ಜಿಲ್ಲಾ, ಆರೋಗ್ಯ ವ್ಯವಸ್ಥೆ, ವ್ಯವಸ್ಥೆಯ ಚಿಂತನೆ, ಸಂಸ್ಥಾನಿಕ ಬದ್ಧತೆ, ಸ್ವಯಂ- ಪರಿಣಮಕಾರಿತ್ವ.
